# Supplementary material for: 6-mercaptopurine promotes energetic failure in proliferating T cells
Source: PubMed Central journal article supplement (PMC5522126; doi:10.18632/oncotarget.17889), 2017-05-16
Supplement: oncotarget-08-43048-s001.pdf [file oncotarget-08-43048-s001.pdf]

## 6-mercaptopurine promotes energetic failure in proliferating T cells

### Supplementary Materials

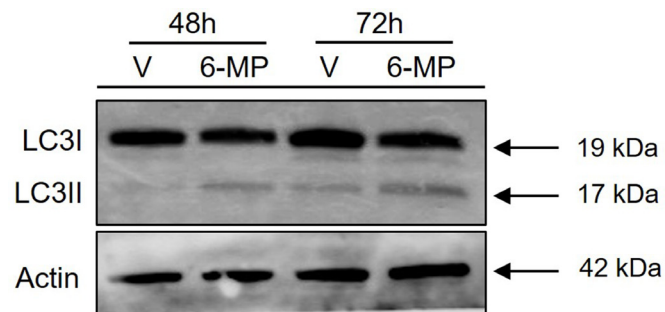

**Supplementary Figure 1: LC3 immunoblot upon 6-MP exposure.** Immunoblot representing LC3I and LC3II after 48 and 72 h incubation with 50  $\mu$ M 6-MP or vehicle (V). The immunoblot is representative of three independent experiments.

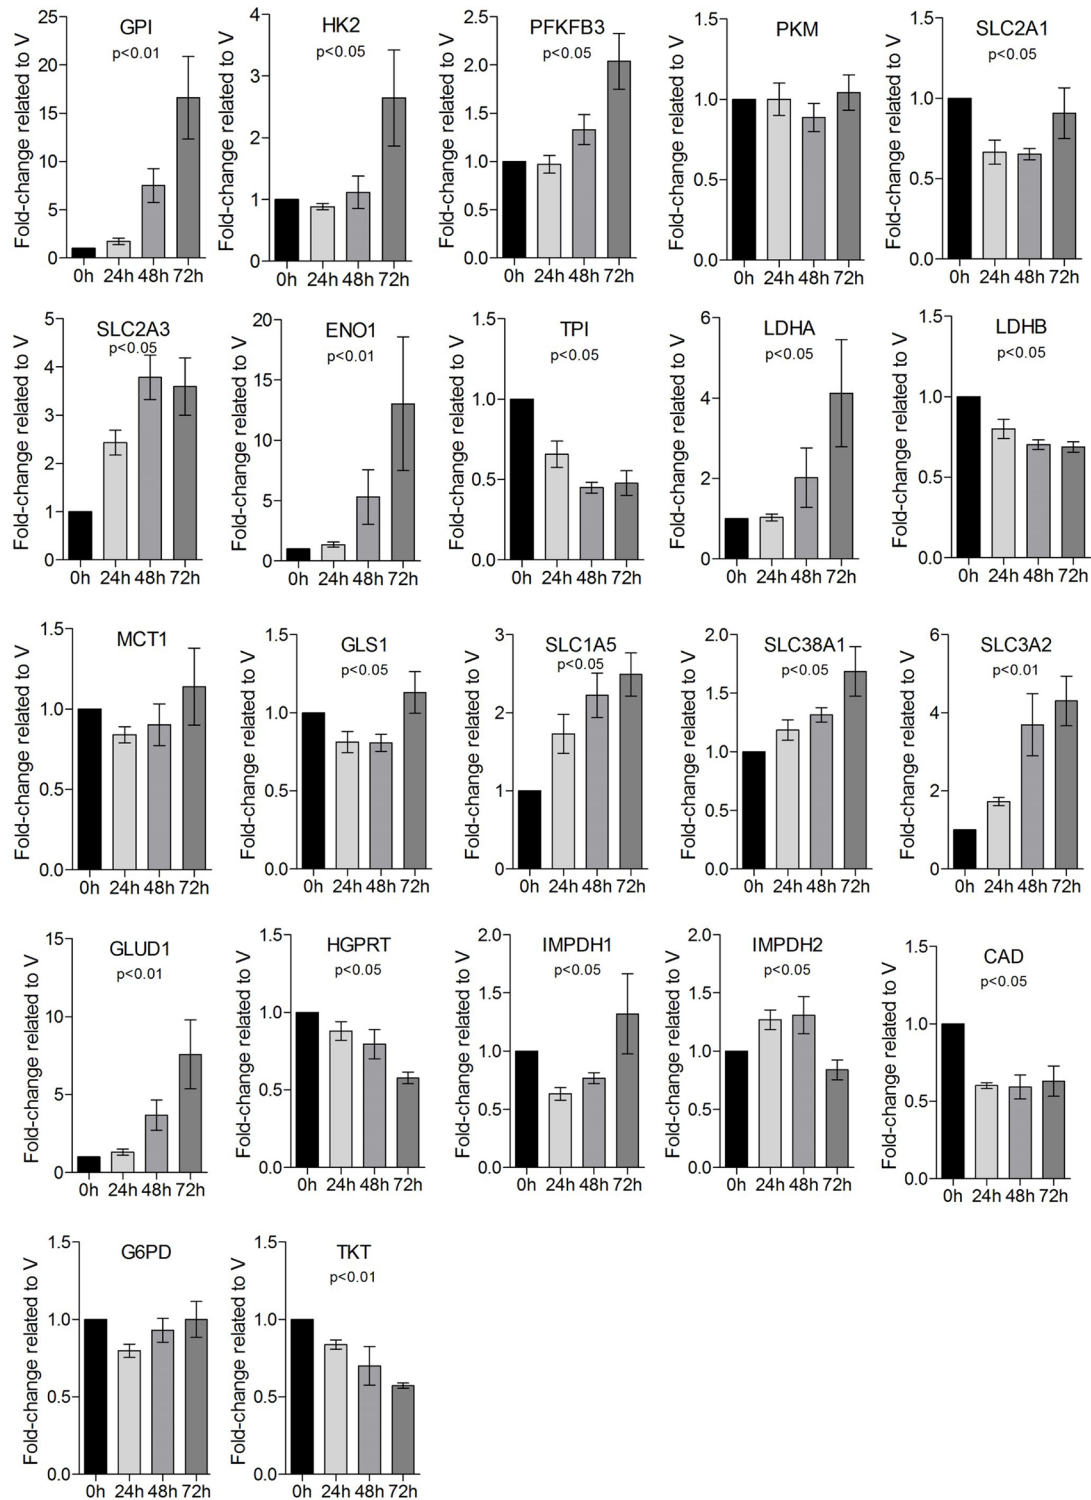

**Supplementary Figure 2: Histograms of each gene implicated in glycolysis, glutaminolysis and nucleotide synthesis after 24, 48 and 72 h of incubation with 6-MP.** Histograms are representative of four independent experiments. One-way ANOVA statistical analysis was performed.

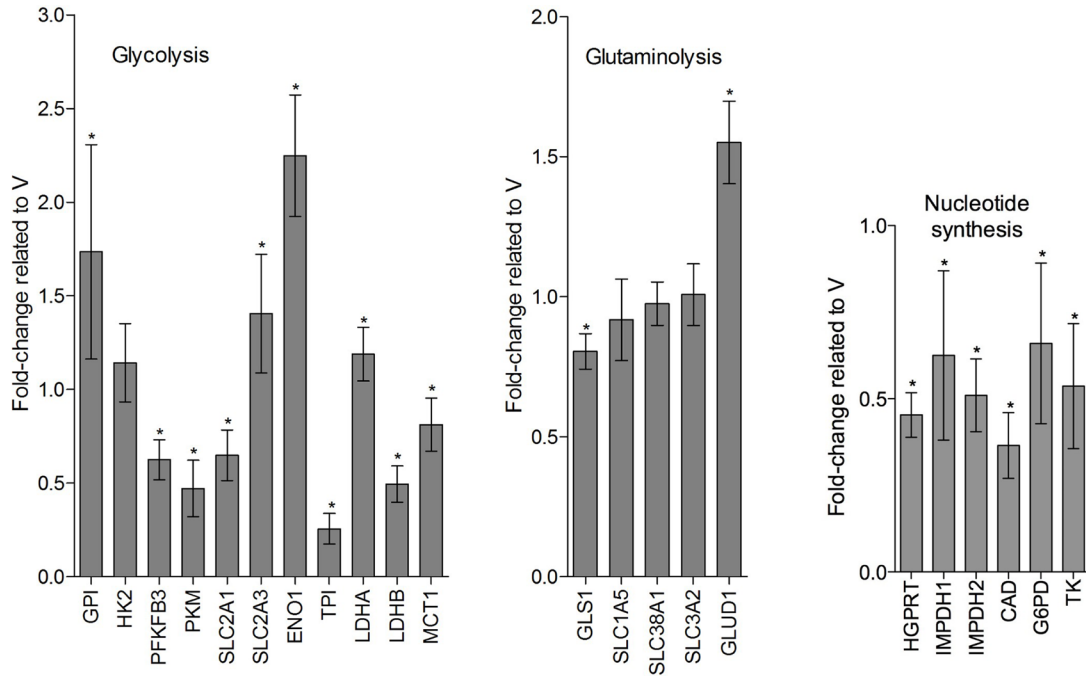

**Supplementary Figure 3: Histograms of each gene implicated in glycolysis, glutaminolysis and nucleotide synthesis after 16 h of glucose and glutamine deprivation.** Histograms are representative of four independent experiments.

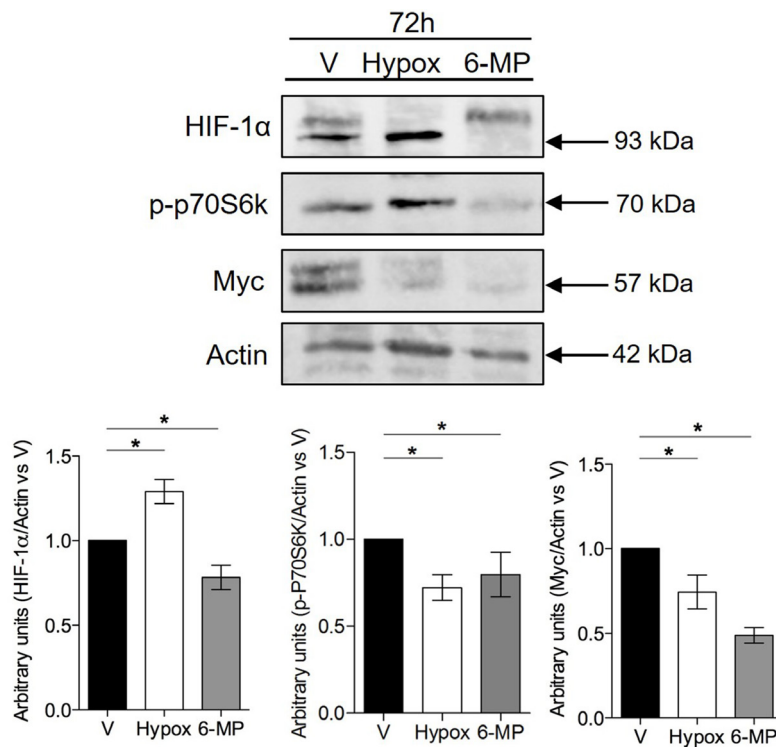

**Supplementary Figure 4: Immunoblot after incubation with 6-MP.** (Top) Immunoblot representing phospho-p70S6K (70 kDa ribosomal protein S6 kinase 1), HIF-1α (hypoxia inducible factor 1α), Myc, and actin protein expression in a human T lymphocyte leukaemia cell line (Jurkat) after 72 h of incubation 50 μM 6-MP or vehicle (V). A 24-h exposure to hypoxia was used as a control. The immunoblot is representative of four independent experiments. (Bottom) Histograms representing the densitometric analysis of the immunoblots.

**Supplementary Table 1: Primer sequences used for RT-PCR analysis**

| Gene name | Primer sequence                                                  |
|-----------|------------------------------------------------------------------|
| GPI       | F 5'-ccaccagcagacacacatca-3'<br>R 5'-cctgtgcactagtgcggcttc-3'    |
| HK2       | F 5'-tggcagacctcatcttccttc-3'<br>R 5'-aaacacacagtggaaactggc-3'   |
| PFKFB3    | F 5'-ggtgtgcgacgacctac-3'<br>R 5'-gtacacgatgcggctctg-3'          |
| PKM       | F 5'-cgggataaccttgaggctga-3'<br>R 5'-gaagagatccggagccacg-3'      |
| SLC2A1    | F 5'-tatgtggagcaactgtgtgt-3'<br>R 5'-tccggccttagctcagga-3'       |
| SLC2A3    | F 5'-gacacagaaggtcaccccag-3'<br>R 5'-gacgaagagtcgacgga-3'        |
| ENO1      | F 5'-ttcggctcaccggtctatc-3'<br>R 5'-ggagagccgtcactattcc-3'       |
| TPI       | F 5'-cgttgggggaaactggaagat-3'<br>R 5'-aaaccacctcgggtcggc-3'      |
| LDHA      | F 5'-acgtcagcatagctgtgcaa-3'<br>R 5'-aggaatcgggaatgcacgtc-3'     |
| LDHB      | F 5'-gcctcctctcctgtgcaa-3'<br>R 5'-cctcttctccgcaactgt-3'         |
| MCT1      | F 5'-ggttataaggcagcctcgc-3'<br>R 5'-ttgctgttccagtaccacg-3'       |
| GLS1      | F 5'-tcccaaggacaggtggaat-3'<br>R 5'-gaggtgtgtgacttgg-3'          |
| SLC1A5    | F 5'-tggactggctagtcaccg-3'<br>R 5'-gggcagctcactctcactt-3'        |
| SLC38A1   | F 5'- gggatttgggactcgcctt-3'<br>R 5'- tacaccatgcagcctgttct-3'    |
| SLC3A2    | F 5'- gggcctggactcttctccta-3'<br>R 5'- ggccacatcccaaagtta-3'     |
| GLUD1     | F 5'- gtaactgcatggctaacctgg-3'<br>R 5'- tctgggcagctcacaataaag-3' |
| HGPRT     | F 5'- ttgcttcttggtcaggca-3'<br>R 5'- atccaacactcgtggggtc-3'      |
| IMPDH1    | F 5'- gtctgccttcggtccatga-3'<br>R 5'- gccgctttcgtaaagatgc-3'     |
| IMPDH2    | F 5'-tggaggcaatgtggtcactg-3'<br>R 5'-gccagcactcctcgtaa-3'        |
| CAD       | F 5'- ggagttgcagctctccc-3'<br>R 5'- gccggttgaacaccactt-3'        |
| G6PD      | F 5'-cgacgacgacgacgaagcgaga-3'<br>R 5'-ggccaggtcaccgatgcac-3'    |
| TKT       | F 5'-tgtgtccagtgcagtagtg-3'<br>R 5'-acacttcatacccgcctag-3'       |
| RPL13A    | F 5'-cctggaggagaagaggaaagaga-3'<br>R 5'-gaggacctgtgtattgtcaa-3'  |
